# Supplementary material for: Association between perceived unmet health care needs and risk of adverse health outcomes among patients with chronic medical conditions
Source: PubMed Central journal article supplement — Open Med. 2013 Feb 26;7(1):e21–30. (PMC3654502), 2013-02-26
Supplement: OpenMed-07-e21-s001.pdf [file OpenMed-07-e21-s001.pdf]

## Appendix A

### Categorization of types of unmet need

---

#### Type of unmet need

- Accessibility (barriers that restrict the entry into or use of health care resources)
    - Cost
    - Transportation
  - Availability (reflecting perceived deficiencies in health care delivery that inhibit a person's ability to receive care)
    - Waiting time too long
    - Care not available when requested
    - Care not available in area
  - Acceptability (personal attributes and attitudes related to the health care system)
    - Dislike doctor/afraid
    - Language problems
    - Didn't know where to go
  - Personal choice (concerning attitudes and competing responsibilities not related to the health care system)
    - Too busy
    - Didn't get around to it/didn't bother
    - Felt it would be inadequate
    - Decided not to seek care
    - Personal/family responsibilities
-
