# Supplementary material for: Association between perceived unmet health care needs and risk of adverse health outcomes among patients with chronic medical conditions
Source: PubMed Central journal article supplement — Open Med. 2013 Feb 26;7(1):e21–30. (PMC3654502), 2013-02-26
Supplement: OpenMed-07-e21-s002.pdf [file OpenMed-07-e21-s002.pdf]

Appendix B

**ICD-9-CM and ICD-10 codes for identifying cause-specific hospitalizations**

| <b>Cause-specific event</b> | <b>ICD-9-CM codes</b>                                               | <b>ICD-10 codes</b>                                                          |
|-----------------------------|---------------------------------------------------------------------|------------------------------------------------------------------------------|
| Acute myocardial infarction | 410                                                                 | I21, I22                                                                     |
| Congestive heart failure    | 428.x                                                               | I50.x                                                                        |
| Stroke                      | 325.x, 362.3, 430.x,<br>431.x, 433.x1, 434.x1,<br>435.x, 436, 437.6 | H34.1, I60.x, I61.x, I63.x,<br>I64.x, I67.7, G08, G45.x<br>(excluding G45.4) |

ICD-9-CM = International Statistical Classification of Diseases and Related Health Problems, 9th revision, Clinical Modification; ICD-10 = International Statistical Classification of Diseases and Related Health Problems, 10th revision.
