# Supplementary material for: Association between perceived unmet health care needs and risk of adverse health outcomes among patients with chronic medical conditions
Source: PubMed Central journal article supplement — Open Med. 2013 Feb 26;7(1):e21–30. (PMC3654502), 2013-02-26
Supplement: OpenMed-07-e21-s003.pdf [file OpenMed-07-e21-s003.pdf]

## Appendix C

### Proportion of participants reporting an unmet health care need, by type and number of chronic medical conditions

| <b>Categorization</b>                       | <b>Proportion with unmet need (%)*</b> |
|---------------------------------------------|----------------------------------------|
| <i>By chronic medical condition</i>         |                                        |
| Arthritis (n = 28 025)                      | 16.0                                   |
| COPD or emphysema (n = 1667)                | 17.6                                   |
| Diabetes mellitus (n = 6943)                | 12.2                                   |
| Heart disease (n = 8315)                    | 14.2                                   |
| Hypertension (n = 21 570)                   | 10.8                                   |
| Mood disorder (n = 13 133)                  | 25.6                                   |
| Stroke (n = 1690)                           | 13.7                                   |
| <i>By no. of chronic medical conditions</i> |                                        |
| 1 (n = 33 515)                              | 15.3                                   |
| 2 (n = 12 675)                              | 14.9                                   |
| ≥ 3 (n = 5742)                              | 17.9                                   |

COPD = chronic obstructive pulmonary disease.

\*Proportions weighted to represent Canadian household population
